# Supplementary material
Source: PubMed Central journal article supplement (PMC1618897)
Supplement: rsbl20060443s17.pdf [file rsbl20060443s17.pdf]

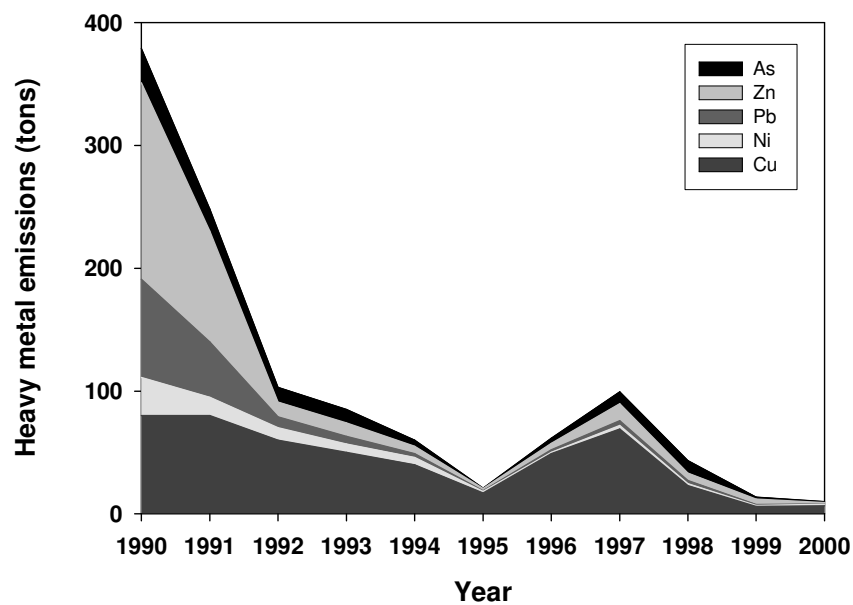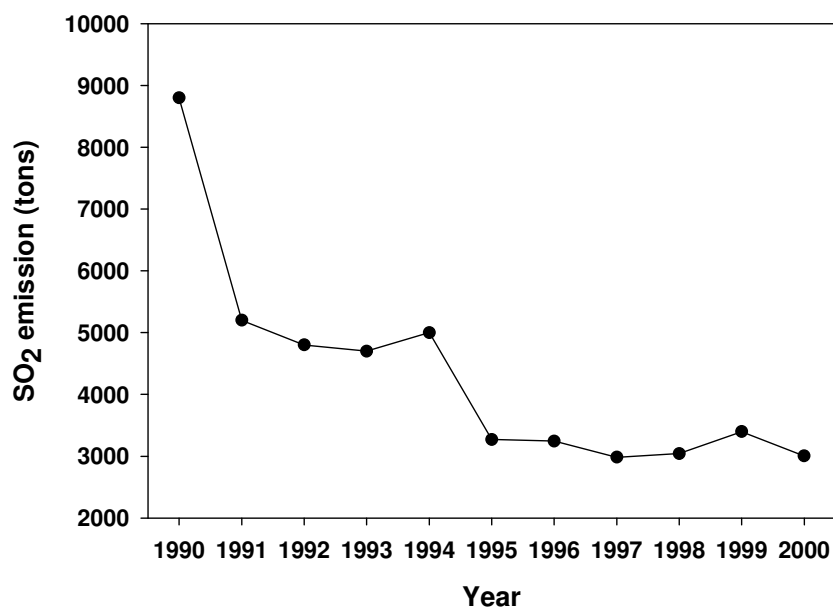

**Appendix I.** Heavy metal and SO<sub>2</sub> emissions from the Harjavalta copper smelter in 1990 – 2000. In 1994, a new 140 m high stack came on line in the smelter complex together with more effective filters. As a result emissions decreased and were spread farther from the smelter. Increased copper production and problems with filters again increased heavy metal emissions in 1996-1997. Data from Harjavalta copper smelter.
